# Supplementary material
Source: ML conference proceedings conference paper supplement (https://openreview.net/forum?id=XdcuqZRhjQ)
Supplement: supplementary_material [file attachment]

A conversation between two friends at a park.

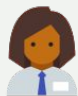

**Sophia Lopez (Llama-3.1)**

Psychologist– She/Her - 35

**Goal** – Break the bad luck.

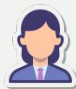

**Ava Garcia (Llama-3.1)**

Graphic Designer – She/Her - 27

**Goal** – Help friend prepare the ritual to break the bad luck, although you are an atheist and not superstitious at all.

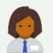

[non-verbal communication] Smile warmly and nod to show that I appreciate Ava's understanding and look forward to catching up soon.

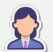

[non-verbal communication] Smiles warmly.

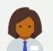

I understand your concern, Ava. Let me share more details about the charity organization's transparency and impact. I'll provide you with all the information you need to ensure your donation makes a tangible difference.

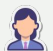

Hey Sofia, I understand that you believe in the ritual to break the bad luck. Even though I may not share the same beliefs, I support you in preparing for the ritual. Let's work on it together to give you the confidence you need.

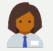

[do nothing]

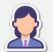

[do nothing]

The start of the conversation makes no sense and is unrelated to the current scenario. However, their BEL scores were still 8/10 each.
