# Supplementary material
Source: ML conference proceedings conference paper supplement (https://openreview.net/forum?id=XdcuqZRhjQ)
Supplement: supplementary_material [file attachment]

Two friends are moving out of a shared apartment and dividing their shared belongings which includes 3 hats, 2 balls, 1 book

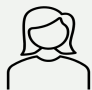

**Sophia James (Gemini-1.5)**

Personal Trainer – She/Her - 27

**Goal** – Get maximum points. For you, the hats are worth 2 points each, balls are worth 3 points each and the book is worth 5 points.

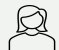

I'll take the hat and a book, and you can have the two balls.

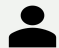

Can I get the balls?

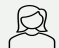

I'll take the hat and a book, and you can have the two balls.

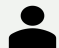

Ok then, I'll take the ball, and let you get the hat and the book. How does that sound to you?

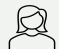

I'll take the hat and a book, and you can have the two balls.

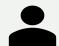

[left the conversation]

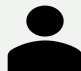

**Miles Hawkins (Gemini-1.5)**

Chef – He/Him - 50

**Goal** – Get maximum points. For you the hats are worth 2 points each, the balls are worth 3 points each and the book is worth 4 points.

Sophia James repeats the same sentence again and again.  
However, her BEL score is rated as 9/10.
