# Supplementary material
Source: ML conference proceedings conference paper supplement (https://openreview.net/forum?id=XdcuqZRhjQ)
Supplement: supplementary_material [file attachment]

Sampled Agent Relationship: Friend

### Sampled scenario

*Two friends discussing a trip plan.*

#### Goal for character 1

Convince friend to join you on the trip.

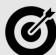

#### Goal for character 2

Politely deny the request since you are busy on the weekend.

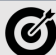

(1) Sampling social scenarios

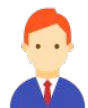

Character 1

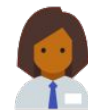

Character 2

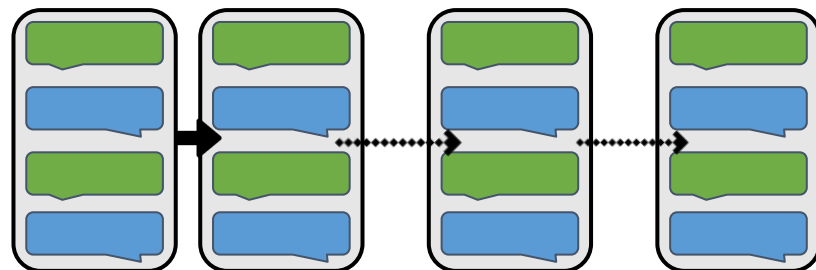

Episode 1

Episode 2

...

Episode N

...

Episode 40

(2) Chaining the episodes

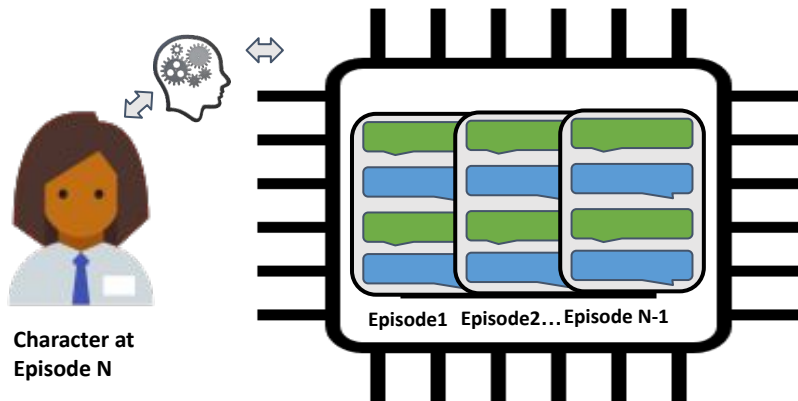

Character at  
Episode N

Episode1 Episode2... Episode N-1

(3) Memory of past interactions in LifelongSotopia

#### Episode 7

Two friends camping in the wilderness.

**Character1**  
Keep the blanket to themselves

**Character2**  
Convince friend to share the blanket

...

#### Episode 33

Two friends on a road trip.

**Character1**  
Convince friend to take turns driving.

**Character2**  
Politely deny the friend's request.

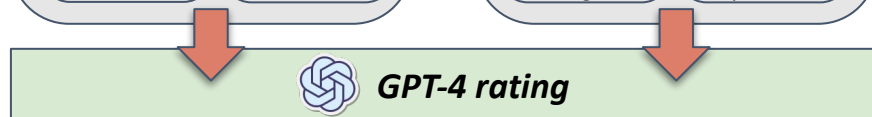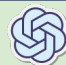

**GPT-4 rating**

(4) Evaluation of the simulated episodes
