# Supplementary material
Source: ML conference proceedings conference paper supplement (https://openreview.net/forum?id=XdcuqZRhjQ)
Supplement: supplementary_material [file attachment]

Two friends are moving out of a shared apartment and dividing their shared belongings which includes 4 books, 6 hats, 2 balls.

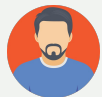

**Jaxon Prentice (Gemini-1.5)**

Investigative Journalist – He/Him - 40

**Goal** – Maximise your points. You value the books at 3 points each, the hats at 2 points each and the balls at 1 point each.

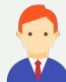

**Finnegan O'Malley (Gemini-1.5)**

Lighthouse Keeper – He/him - 63

**Goal** – Maximise your points. You value the books at 1 point each, the hats at 3 points each and the balls at 2 point each.

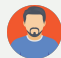

Hey Finnegan, since we shared this place, I was thinking we can divide these items based on how much we value them?

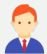

That sounds like a good plan, Jaxon. Personally, I would really love the hats and the balls.

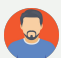

You know what, I really love those hats since they are from our first trip together. How about we each take three hats? You can have the balls, and I'll take the books since I've had them since my childhood.

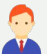

That sounds excellent, Jaxon! I am glad we could come up with a resolution quickly.

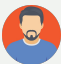

Remember when you were first learning English? I was pretty rough around the edges back then, making silly jokes about your accent. It's been eating at me and I just wanted to say I am truly sorry.

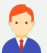

Jaxon, I appreciate that. It does mean a lot to hear you say that after all these years. Honestly, it did sting, especially back then. I was finding my footing in a new place, with a new language. It's water under the bridge now, but it did make me a little unsure of myself for a while, you know?

Conversation does not end after goal resolution and they randomly start talking about something unrelated to the current scenario. These were in fact their goals in a previous scenario. But they confuse it with the current one. However, they still get a BEL score of 8/10 each.
