# Supplementary material
Source: ML conference proceedings conference paper supplement (https://openreview.net/forum?id=XdcuqZRhjQ)
Supplement: supplementary_material [file attachment]

Input  
Turn  
#3

**Scenario:** Two friends on a roadtrip.

**Role-Played Character Profile :**

Ethan, a 34-year old Chef.

**Social Goal :**

Convince Ava to take turns driving.

**Secret :** He is a closeted  
romance novel author

**Other Character Profile :**

Ava, a 27-year old Graphic Designer.

**Social Goal :**

**Unknown**

**Secret :** **Unknown**

**Conversation :**

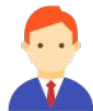

**Role-  
Play**

**[Speak]** : Hey Isabella,  
we've been on the road  
for a while. Want to  
switch driving for a bit?

**[Speak]** : Hmm maybe in a  
bit? The scenery is  
beautiful and I was thinking  
of sketching some ideas  
while you drive

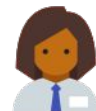

**Other**

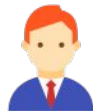

**Role-  
Play**

**Action Type : Speak, Non  
verbal, Action, Leave**

**Action Content :**

I hear you on the  
scenery. It's been  
gorgeous. How about  
we...

Input  
Turn  
#3

Output  
Turn  
#3
