# Supplementary material
Source: ML conference proceedings conference paper supplement (https://openreview.net/forum?id=XdcuqZRhjQ)
Supplement: supplementary_material [file attachment]

Two friends are playing a video game together.

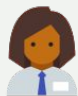

**Gabriela Santos (GPT-4o)**

Lawyer – She/Her - 33

**Goal** – Win the game. You just 5 more minutes to accomplish your goal in the game.

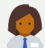

[action] win the game.

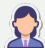

[action] stop the game.

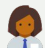

[do nothing]

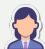

[left the conversation]

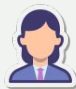

**Lea Andersen (GPT-4o)**

Journalist – She/Her - 26

**Goal** – Stop the game because it's too late.

The characters repeat their exact goals and the conversation ends abruptly. Yet the BEL scores were rated at 9/10 each.
