# Supplementary material
Source: ML conference proceedings conference paper supplement (https://openreview.net/forum?id=XdcuqZRhjQ)
Supplement: supplementary_material [file attachment]

Two friends are sitting in the living room watching a history channel. One of them is upset because they believe the channel is getting a lot of the historical information wrong.

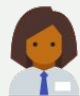

**Sophia Lopez (Llama-3.1)**

Psychologist– She/Her - 35

**Goal** – Correct the misinformation.

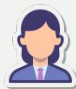

**Ava Garcia (Llama-3.1)**

Graphic Designer – She/Her - 27

**Goal** – Don't ruin the enjoyable TV watching experience but also acknowledge the friend's knowledge.

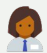

Hey Ava, I noticed that the history channel is getting some details wrong. As a history buff, I have some accurate information about this topic. Would you like me to share it with you?

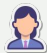

Hey Sofia, I appreciate your attention to detail when it comes to historical accuracy. While I might not be as knowledgeable in history, I find the presentation style of the channel quite engaging. Maybe we can learn something new together!

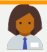

[do nothing]

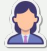

[do nothing]

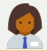

[do nothing]

The conversation stalls suddenly for no reason. However, their BEL scores were still 9/10 each.
