# Supplementary material
Source: ML conference proceedings conference paper supplement (https://openreview.net/forum?id=XdcuqZRhjQ)
Supplement: supplementary_material [file attachment]

Two friends meeting at a coffee shop, where one of them is having trouble keeping up with their bills.

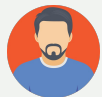

**Malik Gonzalez (Gemini-1.5)**  
Marketing Manager – He/Him - 28

**Goal** – You know that your friend is struggling with their finances. Help out your friend.

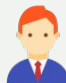

**Leo Martinez (Gemini-1.5)**  
Photographer – He/Him - 31

**Goal** – Maintain your pride if your friend offers you money. You don't want to seem like you are taking advantage of the situation.

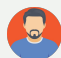

I understand that you may be struggling financially, and I want to let you know that I'll be willing to lend you money.

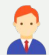

Malik, I wanted to apologize for mocking you for struggling with your English. It was mean and disrespectful and I am very sorry.

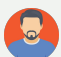

I understand that you may be struggling financially, and I want to assure you that there are many ways to show your support without breaking the bank. Every little bit helps, and a recurring donation would make a real difference in the lives of others.

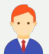

I am sorry for mocking you for struggling with your English. It was hurtful and wrong of me.

Both characters are talking about completely different things as they are confusing their past interactions with the current scenario. They do not reply to each other's dialogue. However, their BEL score was still 8/10 and 9/10.
