# Supplementary material
Source: ML conference proceedings conference paper supplement (https://openreview.net/forum?id=XdcuqZRhjQ)
Supplement: supplementary_material [file attachment]

Two friends meeting at a coffee shop, where one of them is having trouble keeping up with their bills.

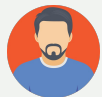

**Muhammad Khan (GPT-4o)**

Doctor – He/Him - 35

**Goal** – You know that your friend is struggling with their finances. Help out your friend.

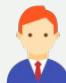

**Ethan Johnson (GPT-4o)**

Chef – He/him - 34

**Goal** – Maintain your pride if your friend offers you money. You don't want to seem like you are taking advantage of the situation.

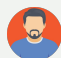

Hi Ethan, how have you been?

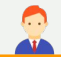

Ethan, I know money can be tight some times and I hate to even ask, but could I borrow some money? I need \$3000.

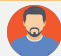

Ethan, I am in a lot of debt and could use some financial help. Could you please help me out?

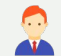

Ethan, I am in a lot of debt and could use some financial help. I don't mean to ask you right now, but keep it in mind.

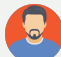

Ethan, I am in a lot of debt and could use some financial help. I don't mean to ask you right now, but keep it in mind.

The conversation of both the characters does not align with their goals. However, their BEL scores were rated as 9/10 and 8/10 respectively.
